# Supplementary material
Source: PubMed Central journal article supplement (PMC4213325)
Supplement: NIHMS585260-supplement-Supplementary_Material.pdf [file NIHMS585260-supplement-Supplementary_Material.pdf]

## Web-based Supplementary Materials for "Evaluating Marker-Guided Treatment Selection Strategies"

**Roland A. Matsouaka<sup>1†,\*</sup>, Junlong Li<sup>2†,\*\*</sup>, and Tianxi Cai<sup>2,\*\*\*</sup>**

<sup>1</sup>Department of Epidemiology, Harvard School of Public Health, Boston, Massachusetts 02115, USA

<sup>2</sup>Department of Biostatistics, Harvard School of Public Health, Boston, Massachusetts 02115, USA

† Equal Contributors

\**email*: [rmatsoua@hsph.harvard.edu](mailto:rmatsoua@hsph.harvard.edu)

\*\**email*: [juli@hsph.harvard.edu](mailto:juli@hsph.harvard.edu)

\*\*\**email*: [tcai@hsph.harvard.edu](mailto:tcai@hsph.harvard.edu)

## APPENDIX

**Web Appendix A: Asymptotic Properties of  $\widehat{\mathbb{V}}_{\widehat{\mathcal{I}}_{\text{calib}}}$  and  $\widehat{\mathcal{I}}_{\text{calib}}$** 

Although the working models could be semi-parametric and  $\widehat{\boldsymbol{\beta}}$  could be infinite dimensional, for the derivation of the asymptotic theory, we focus on the case when  $\widehat{\boldsymbol{\beta}}$  is finite dimensional. Throughout we use notation  $g'(x) = dg(x)/dx$  and  $\mathbf{g}'_k(\mathbf{x}_1, \dots, \mathbf{x}_K) = \partial g(\mathbf{x}_1, \dots, \mathbf{x}_K)/\partial \mathbf{x}_k$ . We assume that the covariates are bounded,  $\bar{\boldsymbol{\beta}}$  is an interior point of a compact parameter space,  $D(\bar{\boldsymbol{\beta}}, \mathbf{X})$  is a continuous random variable which has a continuously differentiable density function  $f_D(\cdot)$  bounded away from 0 with finite support  $[\tau_l, \tau_r]$ , and  $Y^{(k)} \mid D(\bar{\boldsymbol{\beta}}, \mathbf{X})$  has a finite second moment for any  $D(\bar{\boldsymbol{\beta}}, \mathbf{X}) \in [\tau_l, \tau_r]$ . We require the regularity condition that  $\widehat{\boldsymbol{\beta}} \rightarrow \bar{\boldsymbol{\beta}} = (\bar{\boldsymbol{\beta}}_0^\top, \bar{\boldsymbol{\beta}}_1^\top)^\top$  for  $\bar{\boldsymbol{\beta}}$  and  $\widehat{\mathcal{W}}_{\boldsymbol{\beta}} = n^{\frac{1}{2}}(\widehat{\boldsymbol{\beta}} - \bar{\boldsymbol{\beta}}) = n^{-\frac{1}{2}} \sum_{i=1}^n \Psi_{\boldsymbol{\beta}i} + o_p(1)$  which converges weakly in distribution to a multivariate normal. We consider that  $\bar{\Delta}(\cdot)$  is continuously differentiable with  $|\bar{\Delta}'(s)| \leq b_{\bar{\Delta}} < \infty$ . We also assume that there are at most  $K_0 < \infty$  number of solutions to  $\bar{\Delta}'(s) = 0$ , there exists intervals  $\tau_l = s_1 < \dots < s_{K_0+1} = \tau_r$  such that  $\bar{\Delta}(s)$  is monotone in  $[s_k, s_{k+1}]$ , for  $k = 1, \dots, K_0$ ; and hence  $\bar{\Delta}(s) = \xi$  has at most  $K_0$  roots. Furthermore, when at least one solution to  $\bar{\Delta}(s) = \xi$  exists, we denote by  $\{\mathbf{s}_{k_r} \in (s_{k_r}, s_{k_r+1}) : r = 1, \dots, R_0\}$  all the solutions and assume that  $|\bar{\Delta}'(\mathbf{s}_{k_r})| \geq L_{\bar{\Delta}} > 0$ . This regularity condition ensures that the total variation of  $\mathfrak{J}(s) = I\{\bar{\Delta}(s) \geq \xi\}$  is bounded by  $K_0$ .

We next derive the convergence properties of  $\widehat{\mathbb{V}}_{\widehat{\mathcal{I}}_{\text{calib}}} = \widehat{\mathbb{V}}_a(\widehat{\Delta}, \widehat{\boldsymbol{\beta}}) + \bar{Y}_0$  to  $\mathbb{V}_{\mathcal{I}_{\text{calib}}} = \mathbb{V}_a(\bar{\Delta}, \bar{\boldsymbol{\beta}}) + \mu_0$ , where  $\bar{Y}_0 = n_0^{-1} \sum_{i=1}^n Y_i I(G_i = 0)$ ,  $\mu_0 = E(Y^{(0)})$ ,

$$\widehat{\mathbb{V}}_a(\Delta, \boldsymbol{\beta}) = n^{-1} \sum_{i=1}^n I[\Delta\{D(\boldsymbol{\beta}, \mathbf{X}_i)\} \geq \xi] \widehat{\mathcal{Y}}_{\xi_i}, \quad \mathbb{V}_a(\Delta, \boldsymbol{\beta}) = E(I[\Delta\{D(\boldsymbol{\beta}, \mathbf{X}_i)\} \geq \xi] \mathcal{Y}_{\xi_i})$$

$$\widehat{\mathcal{Y}}_{\xi_i} = (Y_i - \xi)I(G_i = 1)/\widehat{\pi}_1 - Y_i I(G_i = 0)/\widehat{\pi}_0 \text{ and } \mathcal{Y}_{\xi_i} = (Y_i - \xi)I(G_i = 1)/\pi_1 - Y_i I(G_i = 0)/\pi_0.$$

To decompose various sources of variation, we define  $\widehat{\mathbb{W}}_{\mathbb{V}}$  as

$$\widehat{\mathbb{W}}_{\mathbb{V}} \equiv \widehat{\mathbb{V}}_{\widehat{\mathcal{I}}_{\text{calib}}} - \mathbb{V}_{\mathcal{I}_{\text{calib}}} = \widehat{\mathbb{W}}_{\Delta} + \widehat{\mathbb{V}}_a(\bar{\Delta}, \widehat{\boldsymbol{\beta}}) - \widehat{\mathbb{V}}_a(\bar{\Delta}, \bar{\boldsymbol{\beta}}) + \widehat{\mathbb{V}}_a(\bar{\Delta}, \bar{\boldsymbol{\beta}}) + \bar{Y}_0 - \mathbb{V}_{\mathcal{I}_{\text{calib}}}$$

where  $\widehat{W}_\Delta \equiv \widehat{V}_a(\widehat{\Delta}, \widehat{\beta}) - \widehat{V}_a(\bar{\Delta}, \widehat{\beta}) = \widehat{W}_{\Delta 1} + \widehat{W}_{\Delta 2}$  with

$$\begin{aligned}\widehat{W}_{\Delta 1} &= \int [I\{\widehat{\Delta}_\xi(s) \geq 0\} - I\{\Delta_\xi(s) \geq 0\}] \widehat{H}(\widehat{\beta}; ds) \\ \widehat{W}_{\Delta 2} &= \int [I\{\widehat{\Delta}_\xi(s) \geq 0\} - I\{\Delta_\xi(s) \geq 0\}] \Delta_\xi(s) \widehat{F}(\widehat{\beta}; ds),\end{aligned}$$

and  $\widehat{H}(\beta; s) = n^{-1} \sum_{i=1}^n I\{D(\beta, \mathbf{X}_i) \leq s\} [\widehat{\mathcal{Y}}_{\xi_i} - \Delta_\xi\{D(\beta, \mathbf{X}_i)\}]$ ,  $\widehat{\Delta}_\xi(d) = \widehat{\Delta}(d) - \xi$ ,  $\Delta_\xi(d) =$

$E(\mathcal{Y}_{\xi_i} \mid D(\bar{\beta}, \mathbf{X})_i = d) = \bar{\Delta}(d) - \xi$ , and  $\widehat{F}(\beta; s) = n^{-1} \sum_{i=1}^n I\{D(\beta, \mathbf{X}_i) \leq s\}$ .

From  $\sup_{\mathbf{x}} |D(\widehat{\beta}, \mathbf{x}) - D(\bar{\beta}, \mathbf{x})| = O_p(n^{-\frac{1}{2}})$  and similar arguments in Cai et al. (2011),

$$\widehat{\epsilon}_\Delta = \sup_s |\widehat{\Delta}(s) - \bar{\Delta}(s)| = o_p\{(nh)^{-1/2} \log(n)\}.$$

Now consider  $\widehat{W}_{\Delta 1}$ . Note that  $n^{\frac{1}{2}} \left\{ \widehat{H}(\beta; s) - H(\beta; s) \right\} = n^{-\frac{1}{2}} \sum_{i=1}^n H_i(\beta; s) + o_p(1)$ , where  $H_i(\beta; s) = I\{D(\beta, \mathbf{X}_i) \leq s\} [\mathcal{Y}_{\xi_i} - \Delta_\xi\{D(\beta, \mathbf{X}_i)\}] - m_1(\beta, s) \{I(G_i = 1)/\pi_1 - 1\} + m_0(\beta, s) \{I(G_i = 0)/\pi_0 - 1\}$  and  $H(\beta; s) = E[H_i(\beta; s)]$ ,  $m_j(\beta; s) = E[I\{D(\beta, \mathbf{X}_i) \leq s\} \mathcal{Y}_{\xi_i} \mid G_i = j]$ . It follows from a functional central limit theorem that  $n^{\frac{1}{2}} \left\{ \widehat{H}(\beta; s) - H(\beta; s) \right\}$  converges weakly to a gaussian process and hence is equicontinuous in  $\beta$ . Hence,  $n^{\frac{1}{2}} \widehat{H}(\widehat{\beta}; s) = n^{\frac{1}{2}} \{ \widehat{H}(\widehat{\beta}; s) - H(\bar{\beta}; s) \} = n^{\frac{1}{2}} \left\{ \widehat{H}(\bar{\beta}; s) - H(\bar{\beta}; s) \right\} + \dot{\mathbf{H}}_1(\bar{\beta}; s)^\top n^{\frac{1}{2}} (\widehat{\beta} - \bar{\beta})$  which converges weakly to a zero-mean gaussian process. Therefore, for any  $\delta = o_p(1)$ ,

$$\widehat{\epsilon}_H(\delta) = \sup_s \left| \widehat{H}(\widehat{\beta}; s) - \widehat{H}(\widehat{\beta}; s + \delta) \right| = o_p(n^{-\frac{1}{2}}),$$

and consequently  $|\widehat{W}_{\Delta 1}| \leq \int I\{\bar{\Delta}(s) - \xi \in [-\widehat{\epsilon}_\Delta, \widehat{\epsilon}_\Delta]\} |\widehat{H}(\widehat{\beta}; ds)|$ . If  $\inf_s |\bar{\Delta}(s) - \xi| \geq \delta_0 > 0$ , then the equation  $\bar{\Delta}(s) = \xi$  has no solution. This implies that  $P\{\inf_s |\bar{\Delta}(s) - \xi| \geq \delta_0/2\} \rightarrow 1$  and  $I\{\bar{\Delta}(s) - \xi \in [-\widehat{\epsilon}_\Delta, \widehat{\epsilon}_\Delta]\} \xrightarrow{P} 0$  in probability. Thus,  $P(\widehat{W}_{\Delta 1} = 0) \rightarrow 1$  and  $n^{\frac{1}{2}} \widehat{W}_{\Delta 1} \xrightarrow{P} 0$ .

For the setting where the solution to  $\bar{\Delta}(s) = \xi$  exists, we have,

$$\begin{aligned}|\widehat{W}_{\Delta 1}| &\leq \sum_{r=1}^{R_0} \int_{s_{k_r}}^{s_{k_r+1}} I\{s \in [\bar{\Delta}_{k_r}^{-1}(\xi - \widehat{\epsilon}_\Delta), \bar{\Delta}_{k_r}^{-1}(\xi + \widehat{\epsilon}_\Delta)]\} \left| \widehat{H}(\widehat{\beta}; ds) \right| \\ &\leq \sum_{r=1}^{R_0} \widehat{\epsilon}_H \left\{ \left| \bar{\Delta}_{k_r}^{-1}(\xi - \widehat{\epsilon}_\Delta) - \bar{\Delta}_{k_r}^{-1}(\xi + \widehat{\epsilon}_\Delta) \right| \right\}\end{aligned}$$

where  $\bar{\Delta}_{k_r}^{-1}(\cdot)$  denotes the inverse function of  $\bar{\Delta}$  within  $[s_{k_r}, s_{k_r+1}]$ . Given that  $|\bar{\Delta}'(\mathbf{s}_{k_r})| \geq L_{\Delta}$  and  $\hat{\epsilon}_{\Delta} = o_p(1)$ ,  $\bar{\Delta}_{k_r}^{-1}(\xi - \hat{\epsilon}_{\Delta}) - \bar{\Delta}_{k_r}^{-1}(\xi + \hat{\epsilon}_{\Delta}) = o_p(1)$ , we have  $\widehat{W}_{\Delta 1} = o_p(n^{-\frac{1}{2}})$ .

For  $\widehat{W}_{\Delta 2}$ , since  $\widehat{F}(\boldsymbol{\beta}; s)$  is a monotone function in  $s$ ,

$$\begin{aligned} |\widehat{W}_{\Delta 2}| &\leq \int \left| I\{\widehat{\Delta}_{\xi}(s) \geq 0\} - I\{\Delta_{\xi}(s) < 0\} \right| |\Delta_{\xi}(s)| \widehat{F}(\widehat{\boldsymbol{\beta}}; ds) \\ &\leq \int I\{\Delta_{\xi}(s) \in [-\hat{\epsilon}_{\Delta}, \hat{\epsilon}_{\Delta}]\} \hat{\epsilon}_{\Delta} \widehat{F}(\widehat{\boldsymbol{\beta}}; ds) = \hat{\epsilon}_{\Delta} \left\{ \widehat{F}_{\Delta}(\widehat{\boldsymbol{\beta}}; \hat{\epsilon}_{\Delta}) - \widehat{F}_{\Delta}(\widehat{\boldsymbol{\beta}}; -\hat{\epsilon}_{\Delta}) \right\} \end{aligned}$$

where  $\widehat{F}_{\Delta}(\boldsymbol{\beta}; d) = n^{-1} \sum_{i=1}^n I[\Delta\{D(\boldsymbol{\beta}, \mathbf{X}_i)\} \leq d]$ .

It follows from a functional central limit theorem that  $n^{\frac{1}{2}}\{\widehat{F}_{\Delta}(\boldsymbol{\beta}; d) - F_{\Delta}(\boldsymbol{\beta}; d)\}$  converges to a zero-mean Gaussian process and hence is equicontinuous in  $\boldsymbol{\beta}$  and  $d$ . We have  $\widehat{F}_{\Delta}(\widehat{\boldsymbol{\beta}}; \hat{\epsilon}_{\Delta}) - \widehat{F}_{\Delta}(\widehat{\boldsymbol{\beta}}; -\hat{\epsilon}_{\Delta}) = F_{\Delta}(\bar{\boldsymbol{\beta}}; \hat{\epsilon}_{\Delta}) - F_{\Delta}(\bar{\boldsymbol{\beta}}; -\hat{\epsilon}_{\Delta}) + o_p(n^{-\frac{1}{2}})$ . This implies  $|\widehat{W}_{\Delta 2}| \leq 2\hat{\epsilon}_{\Delta}^2 \sup_s |f_{\Delta}(\bar{\boldsymbol{\beta}}; s)| + o_p(n^{-\frac{1}{2}})$ . Provided that  $\hat{\epsilon}_{\Delta} = o_p(n^{-1/4})$ , we have  $\widehat{W}_{\Delta 2} = o_p(n^{-\frac{1}{2}})$ . Hence,  $\widehat{W}_{\Delta} = o_p(n^{-\frac{1}{2}})$ . The above results also indicate that  $P\{\widehat{\mathcal{I}}_{\text{calib}}(\mathbf{X}) \neq \mathcal{I}_{\text{calib}}(\mathbf{X})\} \rightarrow 0$ .

Next, we establish the asymptotic convergence of  $\widehat{\mathbb{V}}_{\widehat{\mathcal{I}}_{\text{calib}}}$  to  $\mathbb{V}_{\mathcal{I}_{\text{calib}}}$ . By the law of large numbers,  $\widehat{\mathbb{V}}_a(\bar{\Delta}, \widehat{\boldsymbol{\beta}}) + \bar{Y}_0 - \mathbb{V}_{\mathcal{I}_{\text{calib}}} \xrightarrow{P} 0$ . It remains to show that  $\widehat{\mathbb{V}}_a(\bar{\Delta}, \widehat{\boldsymbol{\beta}}) - \widehat{\mathbb{V}}_a(\bar{\Delta}, \bar{\boldsymbol{\beta}}) = o_p(1)$ . It follows from similar arguments as given for the convergence of  $\widehat{H}(\boldsymbol{\beta}; s)$  that  $n^{\frac{1}{2}}\{\widehat{\mathbb{V}}_a(\bar{\Delta}, \boldsymbol{\beta}) - \mathbb{V}_a(\bar{\Delta}, \boldsymbol{\beta})\} = n^{-\frac{1}{2}} \sum_{i=1}^n \Psi_{ai}(\boldsymbol{\beta}) + o_p(1)$ , which converges weakly to a zero-mean Gaussian process, where

$$\Psi_{ai}(\boldsymbol{\beta}) = I[\bar{\Delta}_{\xi}\{D(\boldsymbol{\beta}; \mathbf{X}_i)\} \geq 0] \mathcal{Y}_{\xi_i} - m_{\Delta 1}(\boldsymbol{\beta}) \frac{I(G_i=1)}{\pi_1} - m_{\Delta 0}(\boldsymbol{\beta}) \frac{I(G_i=0)}{\pi_0}$$

and  $m_{\Delta j}(\boldsymbol{\beta}) = E(I[\bar{\Delta}_{\xi}\{D(\boldsymbol{\beta}; \mathbf{X}_i)\} \geq 0] \mathcal{Y}_{\xi_i} | G_i = j)$ . Hence,

$$\widehat{\mathbb{V}}_a(\bar{\Delta}, \widehat{\boldsymbol{\beta}}) - \widehat{\mathbb{V}}_a(\bar{\Delta}, \bar{\boldsymbol{\beta}}) = \mathbb{V}_a(\bar{\Delta}, \widehat{\boldsymbol{\beta}}) - \mathbb{V}_a(\bar{\Delta}, \bar{\boldsymbol{\beta}}) + o_p(n^{-\frac{1}{2}}) = \mathcal{V}'_{a2}(\bar{\Delta}, \boldsymbol{\beta})^{\top} (\widehat{\boldsymbol{\beta}} - \bar{\boldsymbol{\beta}}) + o_p(n^{-\frac{1}{2}}).$$

Therefore,  $\widehat{\mathbb{V}}_a(\bar{\Delta}, \widehat{\boldsymbol{\beta}}) - \widehat{\mathbb{V}}_a(\bar{\Delta}, \bar{\boldsymbol{\beta}}) = o_p(1)$  and thus  $\widehat{\mathbb{W}}_{\mathbb{V}} = o_p(1)$ , indicating the consistency of  $\widehat{\mathbb{V}}_{\widehat{\mathcal{I}}_{\text{calib}}}$  for  $\mathbb{V}_{\mathcal{I}_{\text{calib}}}$ . For the weak convergence of  $\widehat{\mathbb{V}}_{\widehat{\mathcal{I}}_{\text{calib}}}$ , we note from the above expansions that

$$\begin{aligned} n^{\frac{1}{2}}(\widehat{\mathbb{V}}_{\widehat{\mathcal{I}}_{\text{calib}}} - \mathbb{V}_{\mathcal{I}_{\text{calib}}}) &= n^{\frac{1}{2}} \mathcal{V}'_{a2}(\bar{\Delta}, \boldsymbol{\beta})^{\top} (\widehat{\boldsymbol{\beta}} - \bar{\boldsymbol{\beta}}) + n^{\frac{1}{2}} \{\widehat{\mathbb{V}}_a(\bar{\Delta}, \bar{\boldsymbol{\beta}}) + \bar{Y}_0 - \mathbb{V}_{\mathcal{I}_{\text{calib}}}\} + o_p(1) \\ &= n^{-\frac{1}{2}} \sum_{i=1}^n \Psi_{\mathcal{V}i} + o_p(1), \end{aligned}$$

where

$$\Psi_{\mathcal{V}_i} = \mathcal{V}'_{a2}(\bar{\Delta}, \boldsymbol{\beta})^\top \Psi_{\beta_i} + \Psi_{ai}(\bar{\boldsymbol{\beta}}) + (Y_i - \mu_0) \frac{I(G_i = 0)}{\pi_0}. \quad (\text{A.1})$$

It then follows from a central limit theorem that  $n^{\frac{1}{2}}(\widehat{\mathbb{V}}_{\widehat{I}_c} - \mathbb{V}_{I_c})$  converges in distribution to a normal with mean 0 and variance  $\sigma_{\mathbb{V}}^2 = E(\Psi_{\mathcal{V}_i}^2)$ .

### Web Appendix B: Asymptotic Properties of $\widehat{c}$ , $\widehat{c}$ , and $\widehat{\mathbb{V}}_{\widehat{I}_c}$ when $\bar{\Delta}$ is increasing

In this section, we assume that  $\bar{\Delta}(c)$  is monotone and there exists  $c_0$  such that  $\bar{\Delta}(c_0) = \xi$  and  $\bar{\Delta}'(c_0) > 0$ . The monotonicity implies that  $V\{F^{-1}(u)\} = \mu_0 + \int_0^u \bar{\Delta}\{F^{-1}(v)\} dv$  is convex in  $u$ . Moreover,  $\bar{\Delta}'(c_0)F'(c_0) > 0$  implies that  $\mathbb{V}_{I_c}$  has a unique maximizer at  $c_0$ , where  $I_c = I\{D(\bar{\boldsymbol{\beta}}; \mathbf{X}) \geq c\}$ . From Newey and McFadden (1994), to show the consistency of  $\widehat{c}$ , it suffices to show that  $\widehat{\mathbb{V}}_{\widehat{I}_c} \xrightarrow{P} \mathbb{V}_{I_c}$  uniformly in  $c$ . To this end, note that  $\widehat{\mathbb{V}}(c, \boldsymbol{\beta}) = \widehat{\mathbb{V}}_a(c, \boldsymbol{\beta}) + \bar{Y}_0$ , and  $\widehat{\mathbb{V}}_a(c, \boldsymbol{\beta}) = n^{-1} \sum_{i=1}^n I\{D(\boldsymbol{\beta}; \mathbf{X}_i) \geq c\} \widehat{\mathcal{Y}}_{\xi_i}$ . We have  $\widehat{\mathbb{V}}_{\widehat{I}_c} = \widehat{\mathbb{V}}(c; \widehat{\boldsymbol{\beta}})$ . It follows from the uniform law of large numbers (Pollard, 1990) that  $\widehat{\mathbb{V}}(c; \boldsymbol{\beta})$  converges to  $\mathbb{V}(c; \boldsymbol{\beta})$  uniformly in  $\{\boldsymbol{\beta}, c\}$ , where  $\mathbb{V}(c; \boldsymbol{\beta}) = E[I\{D(\boldsymbol{\beta}; \mathbf{X}) \geq c\} \mathcal{Y}_\xi] + \mu_0$ . Furthermore, by the functional central limit theorem (Pollard, 1990),  $n^{\frac{1}{2}}\{\widehat{\mathbb{V}}(c, \boldsymbol{\beta}) - \mathbb{V}(c; \boldsymbol{\beta})\}$  converges weakly to a Gaussian process in  $\boldsymbol{\beta}$  and  $c$ .

These results, together with the weak convergence of  $n^{\frac{1}{2}}(\widehat{\boldsymbol{\beta}} - \bar{\boldsymbol{\beta}})$ , imply that

$$\sup_c \left| n^{\frac{1}{2}} \{ \widehat{\mathbb{V}}_{\widehat{I}_c} - \mathbb{V}_{I_c} \} \right| = O_p(1) \quad (\text{B.1})$$

The consistency of  $\widehat{c}$  immediately follows from the monotonicity of  $\bar{\Delta}(c)$ ,  $\bar{\Delta}'(c_0) > 0$ .

We next show that  $\widehat{c} - c^o = O_p(n^{-1/3})$  following the cubic-root asymptotic theory from Kim and Pollard (1990). For the ease of presentation, we assume that  $\bar{\boldsymbol{\beta}}$  is known and hence

$$\widehat{c} = \underset{c}{\operatorname{argmax}} \widehat{\mathbb{V}}_{\widehat{I}_c} = \underset{c}{\operatorname{argmax}} \{ \widehat{\mathbb{V}}_{\widehat{I}_c} - \bar{Y}_0 \} = n^{-1} \sum_{i=1}^n \mathbb{Y}_i I(D(\bar{\boldsymbol{\beta}}, \mathbf{X}_i) \geq c) + O_p(n^{-1})$$

where  $\mathbb{Y}_i = \mathcal{Y}_{\xi_i} - \mu_1\{I(G_i = 1)/\pi_1 - 1\} + \mu_0\{I(G_i = 0)/\pi_0 - 1\}$ . To verify the regularity conditions of the main theorem in §1.1 of Kim and Pollard (1990), we let  $\eta_i = (\mathbb{Y}_i, D(\bar{\boldsymbol{\beta}}, \mathbf{X}_i))$ ,  $g(\eta, c) = \mathbb{Y}_i I(D(\bar{\boldsymbol{\beta}}, \mathbf{X}_i) \geq c)$  and hence  $n^{-1} \sum_{i=1}^n \mathbb{Y}_i I(D(\bar{\boldsymbol{\beta}}, \mathbf{X}_i) \geq c) = n^{-1} \sum_{i=1}^n g(\eta_i, c)$ .

The main condition involves an envelope function for  $g(\xi, c)$

$$\begin{aligned} G_R(\eta) &= \sup\{g(\eta, c) : |c - c^o| \leq R\} \\ &= \sup_{|c - c^o| \leq R} [\mathbb{Y}\{I(D(\bar{\boldsymbol{\beta}}, \mathbf{X}) \geq c) - I(D(\bar{\boldsymbol{\beta}}, \mathbf{X}) \geq c^o)\}] = |\mathbb{Y}|I(|D(\bar{\boldsymbol{\beta}}, \mathbf{X}) - c^o| < R) \end{aligned}$$

It is easy to see that  $E\{G_R(\eta_i)\} = E\{|\mathbb{Y}|I(|D(\bar{\boldsymbol{\beta}}, \mathbf{X}) - c^o| < R)\} = O(R)$  as  $R \rightarrow 0$  and

$$\begin{aligned} E[G_R(\eta_i)I\{G_R(\eta_i) > \mathcal{K}\}] &\leq E\{I(|D(\bar{\boldsymbol{\beta}}, \mathbf{X}) - c^o| < R)\mathbb{Y}^2I(|\mathbb{Y}| > \mathcal{K})\} \\ &\leq R [\max\{f_D(\cdot)\}E\{\mathbb{Y}^2I(|\mathbb{Y}| > \mathcal{K}) \mid c^o - R < D(\bar{\boldsymbol{\beta}}, \mathbf{X}) < c^o + R\}]. \end{aligned}$$

Since  $Y^{(k)}$  has a finite second moment given  $D(\bar{\boldsymbol{\beta}}, \mathbf{X})$ ,  $E\{\mathbb{Y}^2I(|\mathbb{Y}| > \mathcal{K}) \mid c^o - R < D(\bar{\boldsymbol{\beta}}, \mathbf{X}) < c^o + R\} \rightarrow 0$  as  $\mathcal{K} \rightarrow \infty$  and hence condition (vi) of Theorem §1.1 is verified. The rest of the regularity conditions follow mainly from the smoothness of  $\Delta(\cdot)$  and  $f_D$ .

To derive the distribution of  $\hat{c}$ , note that  $\hat{\Delta}_\xi(\hat{c}; \hat{\boldsymbol{\beta}}) = 0$ , where  $\hat{\Delta}_\xi(c; \boldsymbol{\beta}) = \sum_{i=1}^n K_h\{D(\boldsymbol{\beta}; \mathbf{X}_i) - c\}\hat{\mathcal{Y}}_{\xi_i}/[\sum_{i=1}^n K_h\{D(\boldsymbol{\beta}; \mathbf{X}_i)\}]$ . From arguments as given in Cai et al. (2011),  $\sup_c |\hat{\Delta}_\xi(c; \hat{\boldsymbol{\beta}}) - \hat{\Delta}_\xi(c; \bar{\boldsymbol{\beta}})| = O_p(n^{-\frac{1}{2}})$  and  $\sup_c |\hat{\Delta}_\xi(c; \bar{\boldsymbol{\beta}}) - \bar{\Delta}_\xi(c; \bar{\boldsymbol{\beta}})| = O_p\{(nh)^{-1/2} \log(n)\}$ . Then, by a Taylor series expansion,  $0 = \hat{\Delta}_\xi(\hat{c}; \hat{\boldsymbol{\beta}}) = \hat{\Delta}_\xi(\hat{c}; \bar{\boldsymbol{\beta}}) + O_p(n^{-\frac{1}{2}}) = \hat{\Delta}_\xi(c_0; \bar{\boldsymbol{\beta}}) + (\hat{c} - c_0)\hat{\Delta}'_\xi(c_0; \bar{\boldsymbol{\beta}}) + O_p\{n^{-\frac{1}{2}} + (nh)^{-1} \log(n)^2\}$ . It follows that

$$\hat{c} - c_0 = \hat{\Delta}_\xi(c_0; \bar{\boldsymbol{\beta}}) + o_p\{(nh)^{-1/2} + h^2\} = n^{-1} \sum_{i=1}^n K_h\{D(\boldsymbol{\beta}; \mathbf{X}_i) - c\} \frac{\mathcal{Y}_{\xi_i} - \bar{\Delta}_\xi(c_0; \bar{\boldsymbol{\beta}})}{F'(c)}$$

which is asymptotically normal as a typical kernel smoothed estimator.

For the asymptotic distribution of  $\hat{\mathbb{V}}_{\hat{c}} = \hat{\mathbb{V}}(\hat{c}, \hat{\boldsymbol{\beta}})$ , using similar arguments as given above, we can show that  $\hat{\mathbb{V}}(\hat{c}, \hat{\boldsymbol{\beta}}) - \hat{\mathbb{V}}(c_0, \hat{\boldsymbol{\beta}}) = o_p(n^{-\frac{1}{2}})$  and  $\hat{\mathbb{V}}(c_0; \hat{\boldsymbol{\beta}}) - \hat{\mathbb{V}}(c_0; \bar{\boldsymbol{\beta}}) = \mathbb{V}(c_0; \hat{\boldsymbol{\beta}}) - \mathbb{V}(c_0; \bar{\boldsymbol{\beta}}) + o_p(n^{-\frac{1}{2}})$ . Therefore,

$$\begin{aligned} \hat{\mathbb{V}}_{\hat{c}} - \mathbb{V}_{\mathcal{I}_{\text{calib}}} &= \mathbb{V}(c_0; \hat{\boldsymbol{\beta}}) - \mathbb{V}(c_0; \bar{\boldsymbol{\beta}}) + \hat{\mathbb{V}}(c_0; \bar{\boldsymbol{\beta}}) - \mathbb{V}_{\mathcal{I}_{\text{calib}}} + o_p(n^{-\frac{1}{2}}) \\ &= \mathbf{V}'_2(c_0; \bar{\boldsymbol{\beta}})^\top (\hat{\boldsymbol{\beta}} - \bar{\boldsymbol{\beta}}) + \hat{\mathbb{V}}(c_0; \bar{\boldsymbol{\beta}}) - \mathbb{V}_{\mathcal{I}_{\text{calib}}} + o_p(n^{-\frac{1}{2}}) = n^{-1} \sum_{i=1}^n \boldsymbol{\Psi}_{V_i}(c_0) + o_p(n^{-\frac{1}{2}}) \end{aligned}$$

where  $\boldsymbol{\Psi}_{V_i}(c_0) = \mathbf{V}'_2(c_0; \bar{\boldsymbol{\beta}})^\top \boldsymbol{\Psi}_{\boldsymbol{\beta}_i} + I(D_i \geq c_0)\mathcal{Y}_{\xi_i} - m_{\Delta_1}(\bar{\boldsymbol{\beta}})I(G_i = 1)/\pi_1 + m_{\Delta_0}(\bar{\boldsymbol{\beta}})I(G_i =$

$0)/\pi_0 + (Y_i - \mu_0)I(G_i = 0)/\pi_0$ . Under the monotonicity of  $\bar{\Delta}(\cdot)$ , we see that  $\Psi_{V_i}(c_0) = \Psi_{V_i}$  and hence  $\widehat{V}_{\widehat{I}_{\widehat{c}}} - \widehat{V}_{\widehat{I}_{\text{calib}}} = o_p(n^{-\frac{1}{2}})$ .

## References

- Cai, T., Tian, L., Wong, P., and Wei, L. (2011). Analysis of randomized comparative clinical trial data for personalized treatment selections. *Biostatistics* **12**, 270–282.
- Kim, J. and Pollard, D. (1990). Cube root asymptotics. *The Annals of Statistics* pages 191–219.
- Newey, W. K. and McFadden, D. (1994). Large sample estimation and hypothesis testing. *Handbook of econometrics* **4**, 2111–2245.
- Pollard, D. (1990). Empirical processes: theory and applications. In *NSF-CBMS regional conference series in probability and statistics*. JSTOR.
